# Supplementary material
Source: Springer Nature journal article supplement (https://www.springermedizin.de/resource/supplementary/12885_2012_4161_MOESM2_ESM.pdf/9465632)

**A1) CA 72.4 – Disease Free Survival**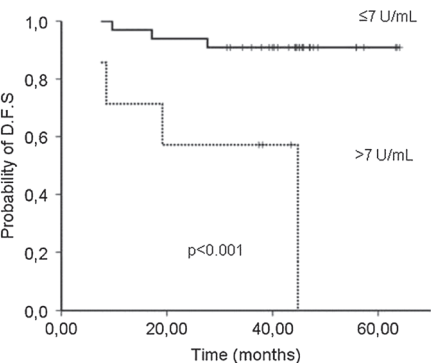**A2) CA 72.4 – Overall Survival**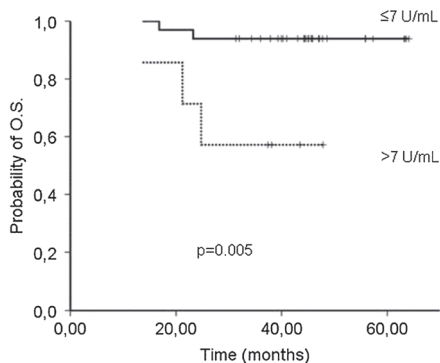**B1) CEA – Disease Free Survival**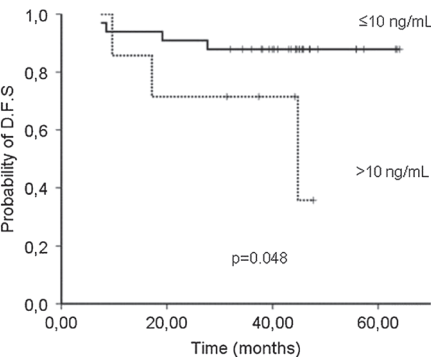**B2) CEA - Overall Survival**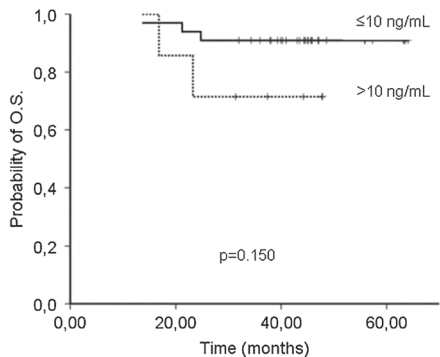**C1) CA 72.4 and/or CEA – Disease Free Survival**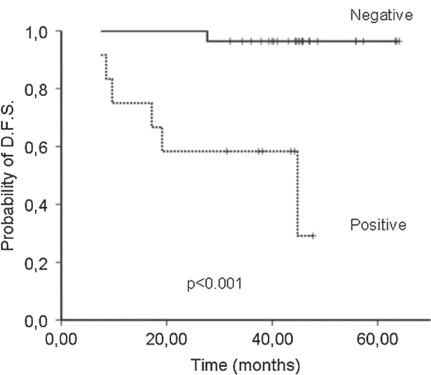**C2) CA 72.4 and/or CEA – Overall Survival**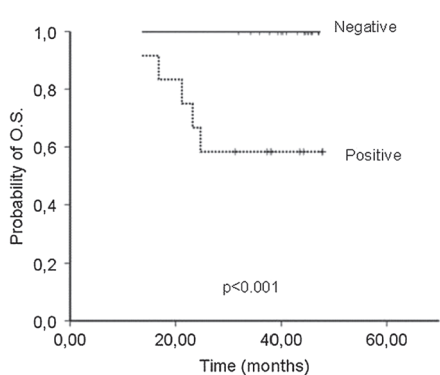

Supplement: MOESM2 [file 9465632]
